## Addendum

**Addendum: Mutually exclusive lymphangiogenesis or perineural infiltration in human skin squamous-cell carcinoma**

**Julien Schaller<sup>1</sup>, H el ene Maby-El Hajjami<sup>1</sup>, Sylvie Rusakiewicz<sup>1</sup>, Kalliopi Ioannidou<sup>2</sup>, Nathalie Piazzon<sup>2</sup>, Alexandra Miles<sup>3</sup>, D ela Golshayan<sup>4</sup>, Olivier Gaide<sup>3</sup>, Daniel Hohl<sup>3</sup>, Daniel E. Speiser<sup>1</sup> and Karin Schaeuble<sup>1</sup>**

<sup>1</sup>Department of Oncology, University Hospital Lausanne (CHUV/UNIL), Lausanne, Switzerland

<sup>2</sup>Institute of Pathology, University Hospital Lausanne (CHUV), Lausanne, Switzerland

<sup>3</sup>Department of Dermatology, University Hospital Lausanne (CHUV), Lausanne, Switzerland

<sup>4</sup>Transplantation Center, University Hospital Lausanne (CHUV/UNIL), Lausanne, Switzerland

**Published:** December 06, 2022

**Copyright:**   2022 Schaller et al. This is an open access article distributed under the terms of the [Creative Commons Attribution License](#) (CC BY 3.0), which permits unrestricted use, distribution, and reproduction in any medium, provided the original author and source are credited.

**This article has an addendum:** The skin squamous-cell carcinoma (sSCC) samples were collected and used in compliance with the study protocol n 2016-01851, approved by Commission cantonale d' ethique de la recherche sur l' tre humain du canton de Vaud (CER-VD), in line with the legal requirements. Patients signed a general consent for use of health-related data.

Original article: Oncotarget. 2021; 12:638–648. <https://doi.org/10.18632/oncotarget.27915>
